# Supplementary material for: Disruption of the self-molecular association of pentanol in binary mixtures with alkylbenzoates: a dielectric relaxation spectroscopy study
Source: Royal Society of Chemistry journal article supplement (doi:10.1039/c5ra18716h), 2015-12-08
Supplement: c5ra18716h1.pdf [file c5ra18716h1.pdf]

### Supplementary Information

## Disruption of self-molecular association of Pentanol in binary mixtures with Alkylbenzoates: A Dielectric Relaxation Spectroscopy Study

Samiyara Begum, Abhinay Vardhan, Atul Chaudhary and Ranga Subramanian<sup>1</sup>

Received (in XXX, XXX) Xth XXXXXXXXXX 20XX, Accepted Xth XXXXXXXXXX 20XX

DOI: 10.1039/b000000x

**Table S1:** Experimental dielectric relaxation parameters for pure pentanols and alkylbenzoates according to Havriliak-Negami model in the 200MHz-20GHz range at room temperature.

| Compound            | $\varepsilon_\alpha$ | $\Delta\varepsilon$ | $\varepsilon_s$ | $\tau$ (ps) | $\alpha$ | $\beta$ | $\chi^2$ | R <sup>2</sup> |
|---------------------|----------------------|---------------------|-----------------|-------------|----------|---------|----------|----------------|
| 1-Pentanol (1P)     | 3.01                 | 17.98               | 20.99           | 1209.40     | 0.8563   | 1       | 0.003360 | 0.9985         |
| 2-Pentanol (2P)     | 2.97                 | 12.73               | 15.7            | 755.31      | 0.8944   | 1       | 0.004344 | 0.9980         |
| 3-Pentanol (3P)     | 2.77                 | 12.12               | 14.89           | 770.08      | 0.8783   | 1       | 0.005613 | 0.9971         |
| Methylbenzoate (MB) | 3.46                 | 3.17                | 6.63            | 34.63       | 1        | 1       | 0.006269 | 0.9981         |
| Ethylbenzoate (EB)  | 3.22                 | 2.72                | 5.94            | 37.73       | 1        | 1       | 0.004536 | 0.9983         |
| Propylbenzoate (PB) | 3.12                 | 2.53                | 5.65            | 48.79       | 1        | 0.9823  | 0.004245 | 0.9982         |
| Butylbenzoate (BB)  | 2.89                 | 2.14                | 5.03            | 56.93       | 1        | 1       | 0.004696 | 0.9976         |

**Table S2:** Experimental dielectric relaxation parameters for pentanols and alkylbenzoates binary mixtures at various concentrations according to Havriliak-Negami model in the 200MHz-20GHz range at room temperature.

| BB         |                      |                     |                 |             |          |         |          |                |
|------------|----------------------|---------------------|-----------------|-------------|----------|---------|----------|----------------|
| 1-pentanol |                      |                     |                 |             |          |         |          |                |
| X of 1-P   | $\varepsilon_\alpha$ | $\Delta\varepsilon$ | $\varepsilon_s$ | $\tau$ (ps) | $\alpha$ | $\beta$ | $\chi^2$ | R <sup>2</sup> |
| 0.1119     | 2.91                 | 2.37                | 5.28            | 57.86       | 1        | 1       | 0.003428 | 0.9983         |
| 0.2202     | 2.91                 | 2.74                | 5.65            | 62.84       | 0.9731   | 0.9808  | 0.003659 | 0.9983         |
| 0.3073     | 2.90                 | 3.06                | 5.96            | 66.94       | 0.9347   | 0.9982  | 0.003828 | 0.9982         |
| 0.4032     | 2.87                 | 3.57                | 6.44            | 77.07       | 0.8850   | 1       | 0.004200 | 0.9980         |
| 0.4996     | 2.84                 | 4.31                | 7.15            | 100.53      | 0.8365   | 1       | 0.004437 | 0.9979         |
| 0.5972     | 2.79                 | 5.46                | 8.25            | 145.83      | 0.7784   | 1       | 0.004756 | 0.9978         |
| 0.6964     | 2.74                 | 7.46                | 10.20           | 256.83      | 0.7198   | 1       | 0.008281 | 0.9960         |
| 0.7983     | 2.70                 | 10.58               | 13.28           | 555.65      | 0.7187   | 1       | 0.003638 | 0.9982         |
| 0.8993     | 2.72                 | 13.78               | 16.50           | 919.87      | 0.7913   | 0.9493  | 0.003691 | 0.9981         |
| 2-pentanol |                      |                     |                 |             |          |         |          |                |
| X of 2-P   | $\varepsilon_\alpha$ | $\Delta\varepsilon$ | $\varepsilon_s$ | $\tau$ (ps) | $\alpha$ | $\beta$ | $\chi^2$ | R <sup>2</sup> |
| 0.1237     | 2.94                 | 2.72                | 5.66            | 63.75       | 0.9839   | 0.8475  | 0.004487 | 0.9980         |
| 0.2232     | 2.91                 | 2.97                | 5.88            | 69.22       | 0.9851   | 0.7857  | 0.004482 | 0.9981         |
| 0.3073     | 2.90                 | 3.23                | 6.13            | 73.58       | 0.9646   | 0.7745  | 0.004851 | 0.9980         |
| 0.4138     | 2.90                 | 3.65                | 6.55            | 82.40       | 0.9196   | 0.8001  | 0.005058 | 0.9979         |
| 0.5070     | 2.88                 | 4.16                | 7.04            | 94.95       | 0.8646   | 0.8451  | 0.005239 | 0.9978         |
| 0.5996     | 2.88                 | 4.87                | 7.75            | 116.36      | 0.8021   | 0.9108  | 0.005342 | 0.9977         |
| 0.6987     | 2.86                 | 5.94                | 8.80            | 177.52      | 0.7672   | 0.9216  | 0.005324 | 0.9977         |
| 0.7987     | 2.87                 | 7.59                | 10.46           | 304.59      | 0.7567   | 0.9283  | 0.005155 | 0.9977         |
| 0.9010     | 3.02                 | 11.77               | 14.79           | 572.83      | 0.7785   | 1       | 0.006728 | 0.9971         |
| 3-pentanol |                      |                     |                 |             |          |         |          |                |

<sup>1</sup> Department of Chemistry, Indian Institute of Technology, Patna, India 800013, Email: ranga@iitp.ac.in; Fax: +91-612-2277383

| X of 3-P | $\varepsilon_\alpha$ | $\Delta\varepsilon$ | $\varepsilon_s$ | $\tau$ (ps) | $\alpha$ | $\beta$ | $\chi^2$ | R <sup>2</sup> |
|----------|----------------------|---------------------|-----------------|-------------|----------|---------|----------|----------------|
| 0.1149   | 2.93                 | 2.61                | 5.54            | 52.50       | 0.9804   | 1       | 0.003557 | 0.9983         |
| 0.2010   | 2.91                 | 2.92                | 5.83            | 51.99       | 0.9683   | 1       | 0.011366 | 0.9949         |
| 0.3020   | 2.96                 | 3.08                | 6.04            | 54.26       | 0.9388   | 1       | 0.003692 | 0.9983         |
| 0.4019   | 2.96                 | 3.47                | 6.43            | 60.50       | 0.9005   | 1       | 0.004270 | 0.9981         |
| 0.5020   | 2.94                 | 3.97                | 6.91            | 70.89       | 0.8565   | 1       | 0.005474 | 0.9976         |
| 0.6021   | 2.90                 | 4.67                | 7.57            | 91.57       | 0.8100   | 1       | 0.007062 | 0.9969         |
| 0.7011   | 2.85                 | 5.63                | 8.48            | 134.81      | 0.7743   | 1       | 0.006183 | 0.9972         |
| 0.7975   | 2.82                 | 7.12                | 9.94            | 235.14      | 0.7633   | 1       | 0.003998 | 0.9981         |
| 0.8986   | 2.81                 | 9.73                | 12.54           | 465.84      | 0.7769   | 1       | 0.003452 | 0.9983         |

**PB**

**1-pentanol**

| X of 1-P | $\varepsilon_\alpha$ | $\Delta\varepsilon$ | $\varepsilon_s$ | $\tau$ (ps) | $\alpha$ | $\beta$ | $\chi^2$ | R <sup>2</sup> |
|----------|----------------------|---------------------|-----------------|-------------|----------|---------|----------|----------------|
| 0.0895   | 3.12                 | 2.80                | 5.92            | 51.74       | 1        | 0.9371  | 0.004898 | 0.9980         |
| 0.2047   | 3.09                 | 3.28                | 6.37            | 57.73       | 0.9458   | 0.9652  | 0.005343 | 0.9978         |
| 0.2917   | 3.11                 | 3.66                | 6.77            | 58.36       | 0.8963   | 1       | 0.006090 | 0.9976         |
| 0.3907   | 3.07                 | 4.34                | 7.41            | 76.29       | 0.8450   | 1       | 0.006382 | 0.9975         |
| 0.4969   | 3.02                 | 5.28                | 8.30            | 94.07       | 0.7716   | 1       | 0.010981 | 0.9957         |
| 0.5974   | 2.93                 | 6.84                | 9.77            | 174.94      | 0.7250   | 1       | 0.006334 | 0.9975         |
| 0.6968   | 2.89                 | 8.83                | 11.72           | 308.41      | 0.7001   | 1       | 0.005798 | 0.9976         |
| 0.7991   | 2.95                 | 11.32               | 14.27           | 495.48      | 0.7162   | 1       | 0.005662 | 0.9976         |
| 0.8999   | 2.98                 | 14.43               | 17.41           | 865.36      | 0.8034   | 0.9375  | 0.005560 | 0.9976         |

**2-pentanol**

| X of 2-P | $\varepsilon_\alpha$ | $\Delta\varepsilon$ | $\varepsilon_s$ | $\tau$ (ps) | $\alpha$ | $\beta$ | $\chi^2$ | R <sup>2</sup> |
|----------|----------------------|---------------------|-----------------|-------------|----------|---------|----------|----------------|
| 0.0996   | 3.27                 | 2.60                | 5.87            | 43.09       | 1        | 1       | 0.007585 | 0.9971         |
| 0.2167   | 3.27                 | 2.91                | 6.18            | 46.56       | 0.9757   | 1       | 0.005236 | 0.9981         |
| 0.3134   | 3.25                 | 3.26                | 6.51            | 52.33       | 0.9392   | 1       | 0.005099 | 0.9981         |
| 0.4072   | 3.21                 | 3.67                | 6.88            | 59.34       | 0.8913   | 1       | 0.007547 | 0.9972         |
| 0.5081   | 3.17                 | 4.24                | 7.41            | 73.50       | 0.8405   | 1       | 0.010466 | 0.9961         |
| 0.6056   | 3.11                 | 5.05                | 8.16            | 102.78      | 0.7922   | 1       | 0.013569 | 0.9947         |
| 0.7004   | 3.05                 | 6.04                | 9.09            | 163.39      | 0.7838   | 1       | 0.005172 | 0.9979         |
| 0.7976   | 2.99                 | 7.62                | 10.61           | 279.66      | 0.776    | 1       | 0.004659 | 0.9980         |
| 0.9002   | 2.98                 | 10.05               | 13.03           | 476.30      | 0.8057   | 1       | 0.007217 | 0.9968         |

**3-pentanol**

| X of 3-P | $\varepsilon_\alpha$ | $\Delta\varepsilon$ | $\varepsilon_s$ | $\tau$ (ps) | $\alpha$ | $\beta$ | $\chi^2$ | R <sup>2</sup> |
|----------|----------------------|---------------------|-----------------|-------------|----------|---------|----------|----------------|
| 0.1110   | 3.21                 | 2.60                | 5.81            | 40.48       | 1        | 1       | 0.010629 | 0.9959         |
| 0.2056   | 3.23                 | 2.83                | 6.06            | 41.96       | 1        | 1       | 0.005993 | 0.9978         |
| 0.3018   | 3.25                 | 3.06                | 6.31            | 43.13       | 0.9820   | 1       | 0.008210 | 0.9970         |
| 0.4019   | 3.25                 | 3.37                | 6.62            | 47.81       | 0.9492   | 1       | 0.008803 | 0.9968         |
| 0.5021   | 3.22                 | 3.81                | 7.03            | 56.56       | 0.9065   | 1       | 0.010144 | 0.9963         |
| 0.5991   | 3.17                 | 4.40                | 7.57            | 72.07       | 0.8616   | 1       | 0.010583 | 0.9961         |
| 0.6983   | 3.06                 | 5.27                | 8.33            | 109.17      | 0.8212   | 1       | 0.008074 | 0.9968         |
| 0.8042   | 2.95                 | 6.59                | 9.54            | 200.05      | 0.8131   | 1       | 0.003787 | 0.9984         |
| 0.8986   | 2.92                 | 8.30                | 11.22           | 344.83      | 0.8327   | 1       | 0.003408 | 0.9984         |

**EB**

**1-pentanol**

| X of 1-P | $\varepsilon_\alpha$ | $\Delta\varepsilon$ | $\varepsilon_s$ | $\tau$ (ps) | $\alpha$ | $\beta$ | $\chi^2$ | R <sup>2</sup> |
|----------|----------------------|---------------------|-----------------|-------------|----------|---------|----------|----------------|
| 0.1094   | 3.28                 | 2.96                | 6.24            | 38.39       | 0.9936   | 1       | 0.004785 | 0.9983         |
| 0.2211   | 3.30                 | 3.40                | 6.70            | 40.43       | 0.9341   | 1       | 0.009158 | 0.9969         |
| 0.3219   | 3.22                 | 3.92                | 7.14            | 49.84       | 0.8973   | 1       | 0.005540 | 0.9981         |
| 0.4100   | 3.17                 | 4.52                | 7.69            | 61.88       | 0.8492   | 1       | 0.005914 | 0.9980         |
| 0.5042   | 3.07                 | 5.46                | 8.53            | 87.23       | 0.7877   | 1       | 0.006782 | 0.9976         |
| 0.5987   | 2.95                 | 6.78                | 9.73            | 143.51      | 0.7357   | 1       | 0.006233 | 0.9976         |
| 0.6986   | 2.94                 | 8.76                | 11.70           | 266.21      | 0.7072   | 1       | 0.005590 | 0.9978         |
| 0.8065   | 3.06                 | 10.95               | 14.01           | 424.38      | 0.7305   | 1       | 0.005281 | 0.9980         |
| 0.9044   | 3.04                 | 13.57               | 16.61           | 736.89      | 0.8037   | 0.9518  | 0.004497 | 0.9981         |

**2-pentanol**

| X of 2-P | $\varepsilon_\alpha$ | $\Delta\varepsilon$ | $\varepsilon_s$ | $\tau$ (ps) | $\alpha$ | $\beta$ | $\chi^2$ | R <sup>2</sup> |
|----------|----------------------|---------------------|-----------------|-------------|----------|---------|----------|----------------|
| 0.1022   | 3.41                 | 2.84                | 6.25            | 34.82       | 0.9818   | 1       | 0.008404 | 0.9973         |
| 0.2125   | 3.41                 | 3.11                | 6.52            | 35.73       | 0.9490   | 1       | 0.008188 | 0.9974         |
| 0.3129   | 2.82                 | 3.88                | 6.70            | 45.61       | 0.8879   | 0.8752  | 0.004776 | 0.9982         |
| 0.4059   | 2.81                 | 4.33                | 7.14            | 48.96       | 0.8134   | 0.9778  | 0.004797 | 0.9981         |
| 0.4977   | 2.77                 | 4.91                | 7.68            | 61.96       | 0.7604   | 1       | 0.004718 | 0.9981         |
| 0.5975   | 2.72                 | 5.83                | 8.55            | 95.20       | 0.7096   | 1       | 0.004774 | 0.9981         |
| 0.6980   | 2.67                 | 7.15                | 9.82            | 183.20      | 0.6764   | 0.9894  | 0.004415 | 0.9981         |
| 0.7959   | 3.09                 | 8.17                | 11.26           | 294.22      | 0.7455   | 1       | 0.005335 | 0.9979         |
| 0.8952   | 3.08                 | 9.95                | 13.03           | 458.26      | 0.7989   | 1       | 0.004833 | 0.9980         |

### 3-pentanol

| X of 3-P | $\varepsilon_\alpha$ | $\Delta\varepsilon$ | $\varepsilon_s$ | $\tau$ (ps) | $\alpha$ | $\beta$ | $\chi^2$ | R <sup>2</sup> |
|----------|----------------------|---------------------|-----------------|-------------|----------|---------|----------|----------------|
| 0.1044   | 2.91                 | 3.08                | 5.99            | 31.04       | 1        | 1       | 0.027726 | 0.9892         |
| 0.2026   | 2.94                 | 3.32                | 6.26            | 31.69       | 0.9851   | 1       | 0.029240 | 0.9891         |
| 0.3006   | 2.89                 | 3.59                | 6.48            | 34.77       | 0.9586   | 1       | 0.028346 | 0.9892         |
| 0.4012   | 2.81                 | 3.99                | 6.80            | 41.17       | 0.9139   | 1       | 0.027414 | 0.9894         |
| 0.4992   | 2.76                 | 4.48                | 7.24            | 49.42       | 0.8569   | 1       | 0.028480 | 0.9888         |
| 0.5999   | 2.68                 | 5.20                | 7.88            | 68.96       | 0.7996   | 1       | 0.027462 | 0.9889         |
| 0.6999   | 2.64                 | 6.33                | 8.97            | 111.52      | 0.7318   | 1       | 0.029871 | 0.9872         |
| 0.7916   | 2.61                 | 7.65                | 10.26           | 211.28      | 0.723    | 1       | 0.022445 | 0.9897         |
| 0.8790   | 2.63                 | 8.93                | 11.56           | 360.77      | 0.7790   | 1       | 0.005771 | 0.9970         |

### MB

#### 1-pentanol

| X of 1-P | $\varepsilon_\alpha$ | $\Delta\varepsilon$ | $\varepsilon_s$ | $\tau$ (ps) | $\alpha$ | $\beta$ | $\chi^2$ | R <sup>2</sup> |
|----------|----------------------|---------------------|-----------------|-------------|----------|---------|----------|----------------|
| 0.1091   | 3.49                 | 3.62                | 7.11            | 31.33       | 0.9941   | 1       | 0.014429 | 0.9960         |
| 0.2081   | 3.43                 | 3.96                | 7.39            | 32.77       | 0.9510   | 1       | 0.021565 | 0.9940         |
| 0.3121   | 3.47                 | 4.52                | 7.99            | 39.43       | 0.9334   | 1       | 0.018442 | 0.9950         |
| 0.4174   | 3.38                 | 5.31                | 8.69            | 49.62       | 0.8895   | 1       | 0.016994 | 0.9954         |
| 0.5274   | 3.23                 | 6.25                | 9.48            | 68.23       | 0.8336   | 1       | 0.017342 | 0.9949         |
| 0.6178   | 3.12                 | 7.38                | 10.50           | 96.56       | 0.7683   | 1       | 0.029228 | 0.9908         |
| 0.7112   | 2.73                 | 9.64                | 12.37           | 193.23      | 0.7084   | 1       | 0.009829 | 0.9964         |
| 0.8059   | 2.33                 | 11.05               | 13.38           | 493.03      | 0.8365   | 0.6933  | 0.008680 | 0.9962         |
| 0.8994   | 2.80                 | 12.95               | 15.75           | 892.53      | 0.9163   | 0.7516  | 0.004800 | 0.9978         |

#### 2-pentanol

| X of 2-P | $\varepsilon_\alpha$ | $\Delta\varepsilon$ | $\varepsilon_s$ | $\tau$ (ps) | $\alpha$ | $\beta$ | $\chi^2$ | R <sup>2</sup> |
|----------|----------------------|---------------------|-----------------|-------------|----------|---------|----------|----------------|
| 0.1026   | 2.75                 | 3.65                | 6.40            | 27.44       | 0.9578   | 1       | 0.012046 | 0.9954         |
| 0.2062   | 2.71                 | 3.96                | 6.67            | 28.50       | 0.9279   | 1       | 0.011130 | 0.9958         |
| 0.3104   | 2.60                 | 4.29                | 6.89            | 31.51       | 0.8863   | 1       | 0.011952 | 0.9953         |
| 0.4068   | 2.54                 | 4.83                | 7.37            | 37.93       | 0.8342   | 1       | 0.012348 | 0.9951         |
| 0.5087   | 2.51                 | 5.49                | 8.00            | 49.96       | 0.7849   | 1       | 0.011561 | 0.9954         |
| 0.6054   | 2.38                 | 6.26                | 8.64            | 69.64       | 0.7277   | 1       | 0.014653 | 0.9938         |
| 0.7013   | 2.33                 | 7.58                | 9.91            | 130.50      | 0.6896   | 1       | 0.008947 | 0.9958         |
| 0.7987   | 2.29                 | 8.66                | 10.95           | 283.91      | 0.7548   | 0.8403  | 0.008552 | 0.9957         |
| 0.8732   | 2.31                 | 9.53                | 11.84           | 448.36      | 0.8391   | 0.7619  | 0.008757 | 0.9953         |

#### 3-pentanol

| X of 3-P | $\varepsilon_\alpha$ | $\Delta\varepsilon$ | $\varepsilon_s$ | $\tau$ (ps) | $\alpha$ | $\beta$ | $\chi^2$ | R <sup>2</sup> |
|----------|----------------------|---------------------|-----------------|-------------|----------|---------|----------|----------------|
| 0.1039   | 2.74                 | 3.50                | 6.24            | 24.74       | 0.9538   | 1       | 0.021774 | 0.9911         |
| 0.1993   | 2.67                 | 3.86                | 6.53            | 28.81       | 0.9369   | 1       | 0.011309 | 0.9955         |
| 0.3005   | 2.62                 | 4.05                | 6.67            | 30.09       | 0.9209   | 1       | 0.014280 | 0.9943         |
| 0.4042   | 2.53                 | 4.60                | 7.13            | 36.69       | 0.8568   | 1       | 0.011626 | 0.9952         |
| 0.5106   | 2.37                 | 5.19                | 7.56            | 47.37       | 0.7823   | 1       | 0.013692 | 0.9941         |
| 0.5939   | 2.37                 | 5.76                | 8.13            | 62.28       | 0.7512   | 1       | 0.011032 | 0.9951         |
| 0.6937   | 2.35                 | 6.40                | 8.75            | 93.48       | 0.7329   | 1       | 0.020333 | 0.9903         |
| 0.7947   | 2.34                 | 7.97                | 10.31           | 175.88      | 0.7053   | 1       | 0.010657 | 0.9946         |
| 0.8722   | 2.28                 | 8.91                | 11.19           | 385.83      | 0.8268   | 0.7874  | 0.009701 | 0.9946         |

**Table S3:** Values of Bruggeman Factor  $f_B$  for pentanol and alkylbenzoate binary mixtures at room temperature.

| 1-pentanol      |       |                 |       |                 |       |                 |       |
|-----------------|-------|-----------------|-------|-----------------|-------|-----------------|-------|
| BB              |       | PB              |       | EB              |       | MB              |       |
| $\varnothing_2$ | $f_B$ | $\varnothing_2$ | $f_B$ | $\varnothing_2$ | $f_B$ | $\varnothing_2$ | $f_B$ |
| 0.9288          | 0.02  | 0.9381          | 0.03  | 0.9155          | 0.03  | 0.9046          | 0.05  |
| 0.8535          | 0.06  | 0.8527          | 0.07  | 0.8243          | 0.07  | 0.8154          | 0.07  |
| 0.7875          | 0.09  | 0.7835          | 0.11  | 0.7373          | 0.11  | 0.7190          | 0.13  |
| 0.7088          | 0.13  | 0.6992          | 0.16  | 0.6571          | 0.16  | 0.6184          | 0.19  |
| 0.6222          | 0.19  | 0.6014          | 0.24  | 0.5670          | 0.23  | 0.5098          | 0.26  |
| 0.5259          | 0.28  | 0.5011          | 0.35  | 0.4717          | 0.33  | 0.4180          | 0.34  |
| 0.4175          | 0.41  | 0.3934          | 0.48  | 0.3649          | 0.47  | 0.3204          | 0.48  |
| 0.2935          | 0.60  | 0.2725          | 0.64  | 0.2422          | 0.61  | 0.2185          | 0.55  |
| 0.1555          | 0.78  | 0.1422          | 0.82  | 0.1234          | 0.77  | 0.1148          | 0.70  |
| 2-pentanol      |       |                 |       |                 |       |                 |       |
| BB              |       | PB              |       | EB              |       | MB              |       |
| $\varnothing_2$ | $f_B$ | $\varnothing_2$ | $f_B$ | $\varnothing_2$ | $f_B$ | $\varnothing_2$ | $f_B$ |
| 0.9205          | 0.08  | 0.9305          | 0.03  | 0.9208          | 0.04  | 0.9099          | -0.03 |
| 0.8504          | 0.11  | 0.8426          | 0.07  | 0.8307          | 0.08  | 0.8162          | 0.01  |
| 0.7865          | 0.14  | 0.7644          | 0.11  | 0.7440          | 0.10  | 0.7193          | 0.04  |
| 0.6984          | 0.19  | 0.6831          | 0.16  | 0.6596          | 0.16  | 0.6272          | 0.10  |
| 0.6137          | 0.25  | 0.5892          | 0.22  | 0.5719          | 0.23  | 0.5270          | 0.19  |
| 0.5218          | 0.32  | 0.4910          | 0.31  | 0.4714          | 0.33  | 0.4292          | 0.27  |
| 0.4134          | 0.43  | 0.3879          | 0.41  | 0.3642          | 0.46  | 0.3295          | 0.42  |
| 0.2917          | 0.58  | 0.2732          | 0.56  | 0.2534          | 0.61  | 0.2252          | 0.54  |
| 0.1523          | 0.93  | 0.1410          | 0.78  | 0.1342          | 0.77  | 0.1435          | 0.63  |
| 3-pentanol      |       |                 |       |                 |       |                 |       |
| BB              |       | PB              |       | EB              |       | MB              |       |
| $\varnothing_2$ | $f_B$ | $\varnothing_2$ | $f_B$ | $\varnothing_2$ | $f_B$ | $\varnothing_2$ | $f_B$ |
| 0.9273          | 0.07  | 0.9232          | 0.02  | 0.9200          | 0.01  | 0.9098          | -0.06 |
| 0.8682          | 0.11  | 0.8529          | 0.06  | 0.8408          | 0.05  | 0.8245          | -0.02 |
| 0.7929          | 0.14  | 0.7764          | 0.10  | 0.7574          | 0.08  | 0.7313          | 0.01  |
| 0.7114          | 0.19  | 0.6907          | 0.14  | 0.6669          | 0.12  | 0.6328          | 0.08  |
| 0.6217          | 0.25  | 0.5981          | 0.19  | 0.5737          | 0.18  | 0.5285          | 0.14  |
| 0.5226          | 0.32  | 0.5011          | 0.26  | 0.4723          | 0.27  | 0.4443          | 0.22  |
| 0.4138          | 0.42  | 0.3934          | 0.35  | 0.3651          | 0.40  | 0.3404          | 0.31  |
| 0.2961          | 0.57  | 0.2676          | 0.49  | 0.2610          | 0.55  | 0.2320          | 0.50  |
| 0.1575          | 0.81  | 0.1449          | 0.66  | 0.1603          | 0.68  | 0.1463          | 0.61  |

**Table S4:** Value of  $a$  for pentanol and alkylbenzoate binary mixtures at room temperature.

|           | 1-pentanol | 2-pentanol | 3-pentanol |
|-----------|------------|------------|------------|
| <b>BB</b> | 1.71(4)    | 1.5(1)     | 1.54(5)    |
| <b>PB</b> | 1.59(3)    | 1.76(2)    | 1.97(7)    |
| <b>EB</b> | 1.79(2)    | 1.77(2)    | 1.99(2)    |
| <b>MB</b> | 1.94(8)    | 2.22(5)    | 2.41(6)    |

**Table S5:** Values of Kirkwood Correlation factor  $g_i$  for pure pentanol and alkylbenzoate at room temperature.

|       | 1P   | 2P   | 3P   | MB   | EB   | PB   | BB   |
|-------|------|------|------|------|------|------|------|
| $g_i$ | 2.81 | 2.18 | 2.28 | 0.44 | 0.45 | 0.40 | 0.44 |

**Table S6:** Values of Effective Kirkwood Correlation factor  $g^{eff}$  and Corrective Kirkwood Correlation factor  $g^f$  for pentanol and alkylbenzoate binary mixtures at room temperature for various pentanol mole fractions.

| 1-pentanol |           |       |                  |                   |                   |        |           |       |                  |                   |                   |        |           |       |                  |                   |                   |        |           |       |                  |                   |                   |
|------------|-----------|-------|------------------|-------------------|-------------------|--------|-----------|-------|------------------|-------------------|-------------------|--------|-----------|-------|------------------|-------------------|-------------------|--------|-----------|-------|------------------|-------------------|-------------------|
| BB         |           |       |                  |                   |                   | PB     |           |       |                  |                   |                   | EB     |           |       |                  |                   |                   | MB     |           |       |                  |                   |                   |
| X          | $g^{eff}$ | $g^f$ | $\Delta F_{exp}$ | $\Delta F_{theo}$ | $\Delta F_{diff}$ | X      | $g^{eff}$ | $g^f$ | $\Delta F_{exp}$ | $\Delta F_{theo}$ | $\Delta F_{diff}$ | X      | $g^{eff}$ | $g^f$ | $\Delta F_{exp}$ | $\Delta F_{theo}$ | $\Delta F_{diff}$ | X      | $g^{eff}$ | $g^f$ | $\Delta F_{exp}$ | $\Delta F_{theo}$ | $\Delta F_{diff}$ |
| 0.1119     | 0.48      | 0.67  | 3.49             | 3.68              | 0.19              | 0.0895 | 0.44      | 0.75  | 3.42             | 3.56              | 0.14              | 0.1094 | 0.43      | 0.64  | 3.24             | 3.46              | 0.21              | 0.1091 | 0.49      | 0.74  | 3.12             | 3.41              | 0.29              |
| 0.2202     | 0.54      | 0.55  | 3.54             | 3.88              | 0.34              | 0.2047 | 0.52      | 0.62  | 3.49             | 3.77              | 0.29              | 0.2211 | 0.50      | 0.54  | 3.27             | 3.69              | 0.41              | 0.2081 | 0.55      | 0.62  | 3.15             | 3.62              | 0.47              |
| 0.3073     | 0.60      | 0.50  | 3.57             | 4.03              | 0.46              | 0.2917 | 0.58      | 0.55  | 3.49             | 3.94              | 0.45              | 0.3219 | 0.59      | 0.52  | 3.40             | 3.89              | 0.50              | 0.3121 | 0.62      | 0.55  | 3.26             | 3.84              | 0.58              |
| 0.4032     | 0.69      | 0.49  | 3.66             | 4.21              | 0.55              | 0.3907 | 0.69      | 0.54  | 3.65             | 4.13              | 0.48              | 0.4100 | 0.69      | 0.51  | 3.53             | 4.08              | 0.55              | 0.4174 | 0.75      | 0.55  | 3.40             | 4.06              | 0.67              |
| 0.4996     | 0.83      | 0.50  | 3.81             | 4.38              | 0.57              | 0.4969 | 0.85      | 0.56  | 3.77             | 4.33              | 0.56              | 0.5042 | 0.86      | 0.55  | 3.73             | 4.27              | 0.54              | 0.5274 | 0.93      | 0.57  | 3.58             | 4.29              | 0.71              |
| 0.5972     | 1.04      | 0.55  | 4.03             | 4.56              | 0.52              | 0.5974 | 1.13      | 0.64  | 4.14             | 4.52              | 0.38              | 0.5987 | 1.10      | 0.62  | 4.02             | 4.46              | 0.44              | 0.6178 | 1.13      | 0.62  | 3.79             | 4.48              | 0.69              |
| 0.6964     | 1.40      | 0.66  | 4.37             | 4.74              | 0.37              | 0.6968 | 1.46      | 0.72  | 4.48             | 4.71              | 0.23              | 0.6986 | 1.42      | 0.70  | 4.39             | 4.67              | 0.28              | 0.7112 | 1.69      | 0.82  | 4.20             | 4.68              | 0.48              |
| 0.7983     | 1.95      | 0.83  | 4.83             | 4.92              | 0.10              | 0.7991 | 1.82      | 0.80  | 4.76             | 4.91              | 0.15              | 0.8065 | 1.69      | 0.73  | 4.67             | 4.89              | 0.22              | 0.8059 | 2.29      | 0.99  | 4.76             | 4.88              | 0.12              |
| 0.8993     | 2.46      | 0.95  | 5.13             | 5.11              | -0.02             | 0.8999 | 2.29      | 0.90  | 5.09             | 5.10              | 0.01              | 0.9044 | 2.11      | 0.82  | 4.99             | 5.09              | 0.10              | 0.8994 | 2.21      | 0.87  | 5.11             | 5.08              | -0.03             |
| 2-pentanol |           |       |                  |                   |                   |        |           |       |                  |                   |                   |        |           |       |                  |                   |                   |        |           |       |                  |                   |                   |
| BB         |           |       |                  |                   |                   | PB     |           |       |                  |                   |                   | EB     |           |       |                  |                   |                   | MB     |           |       |                  |                   |                   |
| X          | $g^{eff}$ | $g^f$ | $\Delta F_{exp}$ | $\Delta F_{theo}$ | $\Delta F_{diff}$ | X      | $g^{eff}$ | $g^f$ | $\Delta F_{exp}$ | $\Delta F_{theo}$ | $\Delta F_{diff}$ | X      | $g^{eff}$ | $g^f$ | $\Delta F_{exp}$ | $\Delta F_{theo}$ | $\Delta F_{diff}$ | X      | $g^{eff}$ | $g^f$ | $\Delta F_{exp}$ | $\Delta F_{theo}$ | $\Delta F_{diff}$ |
| 0.1237     | 0.54      | 0.82  | 3.54             | 3.67              | 0.12              | 0.0996 | 0.40      | 0.72  | 3.31             | 3.55              | 0.24              | 0.1022 | 0.40      | 0.67  | 3.19             | 3.41              | 0.23              | 0.1026 | 0.65      | 1.10  | 3.04             | 3.37              | 0.33              |
| 0.2232     | 0.59      | 0.71  | 3.59             | 3.82              | 0.23              | 0.2167 | 0.45      | 0.61  | 3.36             | 3.74              | 0.38              | 0.2125 | 0.44      | 0.58  | 3.20             | 3.61              | 0.41              | 0.2062 | 0.72      | 0.96  | 3.07             | 3.56              | 0.49              |
| 0.3073     | 0.64      | 0.66  | 3.63             | 3.95              | 0.32              | 0.3134 | 0.51      | 0.57  | 3.43             | 3.89              | 0.47              | 0.3129 | 0.68      | 0.74  | 3.35             | 3.79              | 0.44              | 0.3104 | 0.83      | 0.90  | 3.13             | 3.75              | 0.62              |
| 0.4138     | 0.71      | 0.62  | 3.70             | 4.11              | 0.41              | 0.4072 | 0.58      | 0.55  | 3.50             | 4.05              | 0.54              | 0.4059 | 0.77      | 0.72  | 3.39             | 3.95              | 0.57              | 0.4068 | 0.96      | 0.89  | 3.24             | 3.93              | 0.69              |
| 0.5070     | 0.81      | 0.61  | 3.78             | 4.25              | 0.47              | 0.5081 | 0.68      | 0.55  | 3.63             | 4.21              | 0.58              | 0.4977 | 0.89      | 0.73  | 3.53             | 4.12              | 0.59              | 0.5087 | 1.11      | 0.88  | 3.40             | 4.11              | 0.71              |
| 0.5996     | 0.93      | 0.63  | 3.90             | 4.40              | 0.49              | 0.6056 | 0.83      | 0.59  | 3.83             | 4.37              | 0.54              | 0.5975 | 1.08      | 0.77  | 3.78             | 4.29              | 0.51              | 0.6054 | 1.34      | 0.94  | 3.60             | 4.29              | 0.69              |
| 0.6987     | 1.13      | 0.68  | 4.15             | 4.55              | 0.40              | 0.7004 | 1.01      | 0.64  | 4.10             | 4.52              | 0.42              | 0.6980 | 1.35      | 0.85  | 4.17             | 4.47              | 0.30              | 0.7013 | 1.66      | 1.04  | 3.97             | 4.46              | 0.49              |
| 0.7987     | 1.40      | 0.77  | 4.47             | 4.70              | 0.23              | 0.7976 | 1.30      | 0.74  | 4.42             | 4.68              | 0.26              | 0.7959 | 1.33      | 0.75  | 4.45             | 4.65              | 0.20              | 0.7987 | 1.94      | 1.09  | 4.43             | 4.64              | 0.21              |
| 0.9010     | 1.99      | 0.99  | 4.84             | 4.86              | 0.01              | 0.9002 | 1.71      | 0.87  | 4.74             | 4.85              | 0.11              | 0.8952 | 1.63      | 0.83  | 4.71             | 4.82              | 0.11              | 0.8732 | 2.13      | 1.10  | 4.70             | 4.78              | 0.08              |
| 3-pentanol |           |       |                  |                   |                   |        |           |       |                  |                   |                   |        |           |       |                  |                   |                   |        |           |       |                  |                   |                   |
| BB         |           |       |                  |                   |                   | PB     |           |       |                  |                   |                   | EB     |           |       |                  |                   |                   | MB     |           |       |                  |                   |                   |
| X          | $g^{eff}$ | $g^f$ | $\Delta F_{exp}$ | $\Delta F_{theo}$ | $\Delta F_{diff}$ | X      | $g^{eff}$ | $g^f$ | $\Delta F_{exp}$ | $\Delta F_{theo}$ | $\Delta F_{diff}$ | X      | $g^{eff}$ | $g^f$ | $\Delta F_{exp}$ | $\Delta F_{theo}$ | $\Delta F_{diff}$ | X      | $g^{eff}$ | $g^f$ | $\Delta F_{exp}$ | $\Delta F_{theo}$ | $\Delta F_{diff}$ |
| 0.1149     | 0.52      | 0.80  | 3.43             | 3.65              | 0.23              | 0.1110 | 0.41      | 0.70  | 3.27             | 3.57              | 0.29              | 0.1044 | 0.52      | 0.85  | 3.12             | 3.42              | 0.30              | 0.1039 | 0.63      | 1.05  | 2.98             | 3.37              | 0.39              |
| 0.2010     | 0.58      | 0.72  | 3.42             | 3.79              | 0.36              | 0.2056 | 0.44      | 0.60  | 3.30             | 3.72              | 0.43              | 0.2026 | 0.56      | 0.73  | 3.13             | 3.60              | 0.47              | 0.1993 | 0.72      | 0.95  | 3.07             | 3.55              | 0.48              |
| 0.3020     | 0.60      | 0.61  | 3.45             | 3.94              | 0.49              | 0.3018 | 0.48      | 0.53  | 3.31             | 3.88              | 0.57              | 0.3006 | 0.62      | 0.67  | 3.18             | 3.77              | 0.59              | 0.3005 | 0.78      | 0.84  | 3.10             | 3.73              | 0.64              |
| 0.4019     | 0.67      | 0.57  | 3.51             | 4.10              | 0.58              | 0.4019 | 0.53      | 0.49  | 3.37             | 4.04              | 0.67              | 0.4012 | 0.72      | 0.66  | 3.28             | 3.95              | 0.67              | 0.4042 | 0.92      | 0.84  | 3.22             | 3.93              | 0.71              |
| 0.5020     | 0.76      | 0.56  | 3.61             | 4.25              | 0.64              | 0.5021 | 0.61      | 0.49  | 3.47             | 4.21              | 0.73              | 0.4992 | 0.83      | 0.65  | 3.39             | 4.13              | 0.73              | 0.5106 | 1.12      | 0.87  | 3.37             | 4.12              | 0.75              |
| 0.6021     | 0.90      | 0.58  | 3.76             | 4.41              | 0.65              | 0.5991 | 0.72      | 0.50  | 3.62             | 4.36              | 0.75              | 0.5999 | 1.00      | 0.69  | 3.59             | 4.31              | 0.71              | 0.5939 | 1.25      | 0.86  | 3.53             | 4.27              | 0.74              |
| 0.7011     | 1.09      | 0.63  | 3.99             | 4.56              | 0.57              | 0.6983 | 0.90      | 0.55  | 3.86             | 4.53              | 0.66              | 0.6999 | 1.24      | 0.75  | 3.88             | 4.48              | 0.61              | 0.6937 | 1.41      | 0.86  | 3.77             | 4.46              | 0.69              |
| 0.7975     | 1.36      | 0.72  | 4.32             | 4.71              | 0.39              | 0.8042 | 1.17      | 0.63  | 4.22             | 4.70              | 0.48              | 0.7916 | 1.52      | 0.83  | 4.25             | 4.65              | 0.39              | 0.7947 | 1.77      | 0.96  | 4.15             | 4.64              | 0.50              |
| 0.8986     | 1.82      | 0.87  | 4.72             | 4.86              | 0.14              | 0.8986 | 1.48      | 0.72  | 4.54             | 4.85              | 0.31              | 0.8790 | 1.77      | 0.88  | 4.57             | 4.80              | 0.23              | 0.8722 | 2.04      | 1.02  | 4.61             | 4.79              | 0.17              |
